# Supplementary material for: Stability assessment of roadbed affected by ground subsidence adjacent to urban railways
Source: Copernicus journal article supplement (doi:10.5194/nhess-2017-412), 2017-12-14
Supplement: Supplementary file [file nhess-2017-412-AC1-supplement.pdf]

# Stability assessment of roadbed affected by ground subsidence adjacent to urban railways

Ki-Young Eum<sup>1</sup>, Young-Kon Park<sup>2</sup>, Sang-Soo Jeon<sup>3</sup>

<sup>1</sup>Advanced infrastructure research team, Korea Railroad Research Institute, Chuldobakmulgwan-Ro 176, Uiwang City, Gyeonggi-Do 16105, South Korea

<sup>2</sup>Smart station research team, Korea Railroad Research Institute, Chuldobakmulgwan-Ro 176, Uiwang City, Gyeonggi-Do 16105, South Korea

<sup>3</sup>Department of Civil and Urban Engineering, Inje University, Inje-Ro 197, Gimhae City, Kyungsangnam-Do 50834, South Korea

*Correspondence to:* Sang-Soo Jeon ([ssj@inje.ac.kr](mailto:ssj@inje.ac.kr))

**Abstract.** In recent years, leakages in aged pipelines for water and sewage in urban areas have frequently induced ground loss resulting in cavities and ground subsidence causes the roadbed settlement greater than the allowable value. In this study, FLAC<sup>3D</sup>, which is a three-dimensional finite-difference numerical modeling software, is used to do stability and risk level assessment for the roadbed in adjacent to urban railways with respect to various groundwater levels and the geometric characteristics of cavities. Numerical results show that roadbed settlement increases as the diameter (D) of the cavity increases and the distance (d) between the roadbed and the cavity decreases. The regression analyses results show that, as D/d is greater than 0.2 and less than 0.3, the roadbed is in the status of caution or warning. It requires a database of measurement sensors for real-time monitoring of the roadbed, structures and groundwater to prevent disasters in advance. As D/d exceeds 0.35, the roadbed settlement, which substantially increases and the roadbed is in the status of danger. Since it may result in highly probable traffic accident, train operation should be stopped and the roadbed should be reinforced or repaired. The effects of groundwater level on the roadbed settlement are examined and the analyses results indicate that a roadbed settlement is highly influenced by groundwater levels to an extent greater than even the influence of the size of the cavity.

## 1 Introduction

Urban railways in South Korea have been initiated from the Seoul subway 1<sup>st</sup> line in 1974 and have been operating in Seoul city and several metropolitan cities. The number of passengers using urban railway are being increased and it has played a significantly important role in public transportation for urban development. Urban railway is defined as transportation facility and method for smooth transportation in the city and includes light rail transit and subway as indicated in the law of urban railway (Ministry of land, 2017).

Risk management associated with safety is a fundamental focus in railway operations. It has been integrated into global safety management system of railways (Berrado et al., 2010) and developed to allow a rapid risk assessment using a common risk score matrix (Braband, 2011). As roadbed settlements exceed the allowable limits, it may result in track irregularity and derailments of trains causing heavy loss of life. Therefore, risk management tools are developed to deal with track safety by controlling and reducing the risk of derailments (Zarembski et al., 2006). In this study, methods to secure the stability of roadbeds have been examined using numerical analysis.

Numerical analyses have been widely used for risk assessment. Numerical analyses using three-dimensional geotechnical codes were carried out to predict the subsidence area and its interaction with buildings (Castellanza et al., 2015) and a three-dimensional groundwater flow model for risk evaluation was developed to be an effective management strategy (Ashfaq et al., 2017). The coupling of numerical models and monitoring data contribute to undertake efficient risk reduction policies (Bozzano et al., 2013). Especially using FLAC, which is a finite-difference numerical code especially specialized in the area of geotechnical engineering, numerical computations to simulate the influence of rainfall (Pisani, 2010), both acoustic emission (AE) activities at AE sensor locations of

48 the Kannagawa cavern (Cai et al., 2007), and a comprehensive pump test at Sellafield (Hakami, 2001) showed  
49 good agreement with field monitoring results. In this study, FLAC<sup>3D</sup>, which is a three-dimensional finite-difference  
50 numerical code especially specialized in the area of geotechnical engineering, is adopted for numerical analysis.

51 Research on stability assessment and reinforcement of railway roadbeds has been actively carried out, but the  
52 effect of the cavity adjacent to urban railways on roadbed behavior has rarely studied. In recent years, the number  
53 of accidents induced by cavities larger than 2 m in diameter has increased especially in highly populated cities in  
54 South Korea. Therefore, the residents in these cities were terrified of cavities after the accidents (Shin and Roh,  
55 2006). Especially, ground subsidence near subways due to self-weight and/or surcharge loading was around 60%  
56 (Lee and Kang, 2014). Changes in groundwater levels may cause increased occurrences of ground subsidence  
57 because the lowering of groundwater levels lead to ground settlement (Lee et al., 2015). Groundwater level  
58 influences both ground settlement and stability of underground structures. Deep excavation of the ground adjacent  
59 to urban railways has a significance influence on the allowable tensile strength of underground structures (Lee at  
60 al., 2017). If large underground cavities are located at nearby roadbeds, there is a high potential of ground  
61 subsidence.

62 Ground subsidence (Fig. 1) in South Korea occurred at nearby urban railways most recently (Kyunghang times,  
63 2016). The ground subsidence (Fig. 1a) occurred with a cavity of depth 5 m, width 8 m, and length 80 m near the  
64 Seokchon subway station in Seoul City. The accident was induced by the inappropriate deep excavation near the  
65 subway. The ground subsidence (Fig. 1b) was caused by the leakage of a water pipeline with a large-scale cavity  
66 of depth 21 m, width 11 m, and length 12 m near Bakchon subway station in Incheon City (Newshankuk, 2016).  
67 The ground subsidence (Fig. 1c) occurred near Samseongjungang subway station. Six cavities were found almost  
68 simultaneously in Seoul City (Kyunghang times, 2016). A small-scale cavity of depth 2.2 m (Fig. 1d) occurred  
69 near Janghanpyeong subway station in Seoul City, but the cause of this accident has not been clarified. The  
70 accident was assumed to be caused by inappropriate recovery construction near subway extension.

71 Ground subsidence with a cavity having depth 3.6 m (Fig. 1e) occurred as the replacement work of a sewage  
72 pipeline was carried out at Texas in the US (Wikitree, 2016). Ground subsidence with a cavity having a width of  
73 15 m (Fig. 1f) occurred as tunnel excavation work for subway extension was carried out at Fukuoka in Japan  
74 (Chosun Ilbo, 2016). Ground subsidence with a cavity of width 25 m (Fig. 1g) occurred as a 50 m tunnel  
75 excavation near the light rail transit was carried out at Ottawa in Canada (Yonhap news, 2016). Ground subsidence  
76 with a cavity of depth 10 m (Fig. 2h) occurred as subway construction was carried out near Guangzhou in China  
77 (Sisa china, 2016). Ground subsidence with a large-scale cavity in urban areas is highly correlated with the  
78 undiscerned development of urban areas, abuse of groundwater and inappropriate underground construction.

79

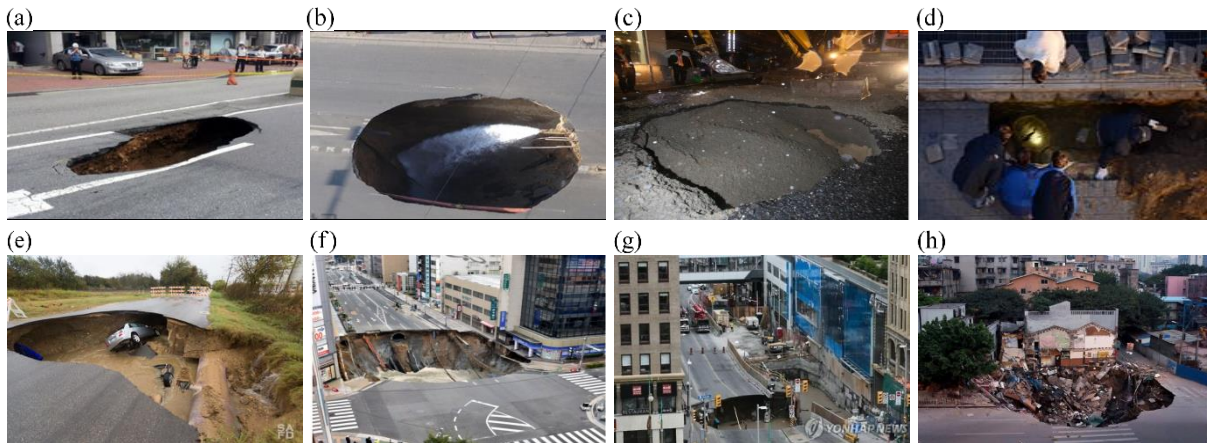

81 **Figure 1.** Ground subsidence nearby subway of urban railway: (a) Seokchon subway station, (b) Bakchon subway station, (c)  
82 Samseongjungang subway station, (d) Janghanpyeong subway station in South Korea, (e) Texas in the US, (f) Fukuoka in  
83 Japan, (g) Ottawa in Canada, and (h) Guangzhou in China.

84

85 80% of the ground subsidence occurred from 2010 until the beginning of 2014 in Seoul City was induced by  
86 aged pipelines for water and sewage (Oh et al., 2015). Since 48% and 30% of sewage pipelines in Seoul city were  
87 constructed more than thirty and fifty years ago, respectively. Aged pipelines for water and sewage pipelines cause

88 numerous cavities in the near future (The Segye times, 2016).

89 As a cavity exists at the center of the railway track in the box structures of urban railways, its influence on box  
90 structures and roadbed settlements has been examined to observe the effects of cavities adjacent to the roadbeds of  
91 urban railways (Lee et al., 2015). A method to establish a database was proposed to prevent and manage the  
92 disasters (Choi et al., 2007).

93 As a cavity exists adjacent to the roadbed, in this study, a three-dimensional numerical analysis using FLAC<sup>3D</sup> is  
94 carried out to assess both roadbed stability and risk level with respect to the distance between the center of the  
95 roadbed and the center of the cavity, diameter of the cavity, and groundwater levels.

96  
97  
98

## 2 Numerical analysis

99 In the following sections, the FLAC<sup>3D</sup> given in this work are briefly described in the following sections by  
100 paraphrasing from those of Itasca Consulting Group (2002).

101

### 2.1 Theoretical background of FLAC<sup>3D</sup>

102  
103

104 FLAC<sup>3D</sup> (Fast Lagrangian Analysis of Continua in three Dimensions) is numerical modeling software for advanced  
105 geotechnical analysis of soil, rock, groundwater, and ground support in three dimensions. FLAC is used for  
106 analysis, testing, and design by geotechnical, civil, and mining engineers (Itasca Consulting Group Inc., 2002). It is  
107 designed to accommodate any kind of geotechnical engineering project that requires continuum analysis.

108 The mechanics of the medium are derived from general principles (definition of strain, laws of motion), and the  
109 use of constitutive equations defining the idealized material. The resulting mathematical expression is a set of  
110 partial differential equations, relating mechanical (stress) and kinematic (strain rate, velocity) variables, which are  
111 to be solved for particular geometries and properties, given specific boundary and initial conditions.

112 An important aspect of the model is the inclusion of the equations of motion, although FLAC3D is primarily  
113 concerned with the state of stress and deformation of the medium near the state of equilibrium. It will be shown, in  
114 the numerical implementation section, that the inertial terms are used as means to reach, in a numerically stable  
115 manner, the equilibrium state.

116

#### 2.1.1 Conventions

117  
118

119 In the Lagrangian formulation adopted in FLAC<sup>3D</sup>, a point in the medium is characterized by the vector  
120 components  $x_i$ ,  $u_i$ ,  $v_i$  and  $d_{v_i}/dt$ ,  $i=1,3$  of position, displacement, velocity and acceleration, respectively. As a  
121 notation convention, a bold letter designates a vector or tensor, depending on the context. The symbol  $a_i$  denotes  
122 component  $i$  of the vector  $[a]$  in a Cartesian system of reference axes;  $A_{ij}$  is component  $(i, j)$  of tensor  $[A]$ . Also,  $a_{,i}$   
123 is the partial derivative of  $a$  with respect to  $x_i$ . ( $a$  can be a scalar variable, a vector or tensor component.) By  
124 definition, tension and extension are positive. The Einstein summation convention applies, but only on indices  $i, j$   
125 and  $k$ , which take the values 1, 2, 3.

126

127

#### 2.1.2 Stress

128  
129

130 The state of stress at a given point of the medium is characterized by the symmetric stress tensor  $\sigma_{ij}$ . The traction  
131 vector  $[t]$  on a face with unit normal  $[n]$  is given by Cauchy's formulae (tension positive):

132

$$133 \quad t_i = \sigma_{ij} n_j \quad (1)$$

134

#### 2.1.3 Rate of Strain and Rate of Rotation

135  
136

137 Let the particles of the medium move with velocity  $[v]$ . In an infinitesimal time  $dt$ , the medium experiences an  
138 infinitesimal strain determined by the translations  $v_i dt$ , and the corresponding components of the strain-rate tensor  
139 may be written as

140

141  $\xi_{ij} = 1/2(v_{i,j} + v_{j,i})$  (2)

142  
 143 where partial derivatives are taken with respect to components of the current position vector  $[x]$ . For later  
 144 reference, the first invariant of the strain-rate tensor gives a measure of the rate of dilation of an elementary volume.  
 145 Aside from the rate of deformation characterized by the tensor  $\xi_{ij}$ , a volume element experiences an instantaneous  
 146 rigid-body displacement, determined by the translation velocity  $[v]$ , and a rotation with angular velocity,

147 
$$\Omega_i = -1/2e_{ijk}\omega_{jk}$$
 (3)

148 where  $e_{ij}$  is the permutation symbol, and  $[\omega]$  is the rate of rotation tensor whose components are defined as

149 
$$\omega_{ij} = 1/2(v_{i,j} - v_{j,i})$$
 (4)

150  
 151  
 152  
 153 **2.1.4 Equations of Motion and Equilibrium**

154  
 155 Application of the continuum form of the momentum principle yields Cauchy's equations of motion:

156 
$$\sigma_{ij,j} + \rho b_i = \rho(dv_i/dt)$$
 (5)

157  
 158 where  $\rho$  is the mass per unit volume of the medium,  $[b]$  is the body force per unit mass, and  $d[v]/dt$  is the  
 159 material derivative of the velocity. These laws govern, in the mathematical model, the motion of an elementary  
 160 volume of the medium from the forces applied to it. Note that in the case of static equilibrium of the medium, the  
 161 acceleration  $d[v]/dt$  is zero, and Eq. (5) reduces to the partial differential equations of equilibrium:

162 
$$\sigma_{ij,j} + \rho b_i = 0$$
 (6)

163  
 164  
 165  
 166 **2.1.5 Boundary and Initial Conditions**

167  
 168 The boundary conditions consist of imposed boundary tractions (see Eq. (1)) and/or velocities (to induce given  
 169 displacements). In addition, body forces may be present. Also, the initial stress state of the body needs to be  
 170 specified.

171  
 172 **2.1.6 Constitutive Equations**

173  
 174 The equations of motion Eq. (5), together with the definitions Eq. (2) of the rates of strain, constitute nine  
 175 equations for fifteen unknowns — the unknowns being the 6 + 6 components of the stress- and strain-rate tensors  
 176 and the three components of the velocity vector. Six additional relations are provided by the constitutive equations  
 177 that define the nature of the particular material under consideration. They are usually given in the form

178 
$$[\dot{\sigma}]_{ij} = H_{ij}(\sigma_{ij}, \xi_{ij}, k)$$
 (7)

179  
 180 in which  $[\dot{\sigma}]_{ij}$  is the co-rotational stress-rate tensor,  $[H]$  is a given function, and  $k$  is a parameter that takes into  
 181 account the history of loading. The co-rotational stress rate  $[\dot{\sigma}]$  is equal to the material derivative of the stress as it  
 182 would appear to an observer in a frame of reference attached to the material point and rotating with it at an angular  
 183 velocity equal to the instantaneous value of the angular velocity  $[\Omega]$  of the material. Its components are defined as

184 
$$[\dot{\sigma}]_{ij} = (d\sigma_{ij}/dt) - \omega_{ik}\sigma_{kj} + \sigma_{ik}\omega_{kj}$$
 (8)

185  
 186 in which  $d[\sigma]/dt$  is the material time derivative of  $[\sigma]$ , and  $[\omega]$  is the rate of rotation tensor.

187  
 188  
 189  
 190 **2.2 Conditions for numerical analysis**

191  
 192 The Mohr-Coulomb failure model has been used for the analysis (Itasca Consulting Group Inc., 2015). Since there

193 are various causes and sizes of the cavity of ground subsidence occurring near urban railway, it is very difficult to  
 194 simulate the process of cavity generation. A circular cavity below the ground surface has been modeled with  
 195 respect to diameters (D) of 4-10 m, which is selected by historical events as described in previous section.  
 196 Distances of 15-25 m from the cavity to the center of the roadbed and various groundwater levels are arbitrarily  
 197 selected for roadbed settlement influenced by given size of cavity. The analysis is performed based on the  
 198 configuration of the analysis (Fig. 2). As shown in the figure, roller supports prevent normal translations, but  
 199 capable of tangential translations and/or rotations. There is a single linear reaction force in either vertical or  
 200 horizontal directions.

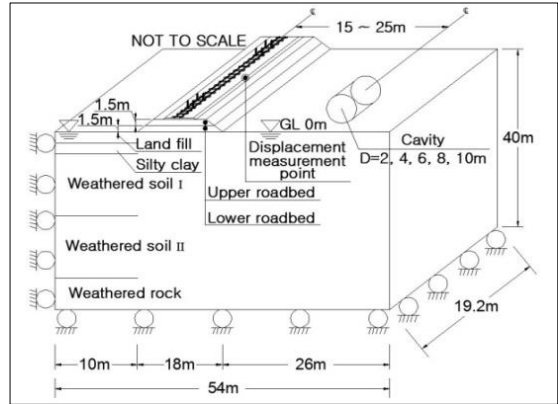

Figure 2. Configuration of the railway roadbed and cavity

### 2.2.1 Ground conditions

220 An embankment consists of the lower roadbed, upper roadbed, and gravel ballast. The roadbed width at the  
 221 bottom of the ballast is 8m. The widths of its bottom and top are 5.1 m and 3.3 m, respectively, and its slope is  
 222 1:1.8. In-situ soil consists of reclaimed soil, silty clay, weathered soil, and weathered rock. Its physical properties  
 223 listed in Table 1 are obtained from lab experiments of soil sampled at a construction site.

### 2.2.2 Physical properties of rail, rail pad, and prestressed concrete (PC) sleeper

227 KS60 rail and prestressed concrete (PC) sleeper commonly used in gravel ballast have been used for the  
 228 numerical analysis. A rail pad, which is widely used to minimize vibration and impact loading during train  
 229 operation is made of ethylene vinyl acetate (EVA). However, in this study, a thermoplastic polyurethane (TPU)  
 230 rail pad, which is more economical and has higher tensile strength has been used for the numerical analysis. Its  
 231 properties are listed in Table 1. The beam element is used for the rail and rail pad.

### 2.2.3 Applied train loading

235 An axial load of the urban railway train (16 tons) is applied for the numerical analysis. The effective loading is  
 236 estimated by multiplying 1.2 with half of the axial load considering a wheel loading increment of 20% and a  
 237 marginal safety of deficiency of the cant. Dynamic loading to reflect dynamic impact ratio (Fig. 3) was estimated  
 238 by multiplying 1.2 with the effective loading (Ministry of land, 2013).

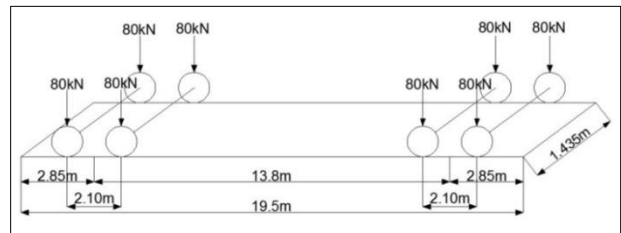

Figure 3. Configuration of the train load

241  
242

**Table 1.** Physical properties of soil, rail, PC sleeper and the rail pad

|            | Soil type               | Height (m)                       | Unit weight (kN/m <sup>3</sup> ) | Elastic modulus (kPa)                         | Poisson's ratio (ν) | Cohesion (kPa)                          | Friction angle (°)                     | Coefficient of permeability (cm/s) | K <sub>o</sub> |
|------------|-------------------------|----------------------------------|----------------------------------|-----------------------------------------------|---------------------|-----------------------------------------|----------------------------------------|------------------------------------|----------------|
| Soil       | Ballast stone           | 0.3                              | 19.0                             | 133,900                                       | 0.30                | -                                       | 35                                     | -                                  | 0.43           |
|            | Upper roadbed           | 1.5                              | 18.0                             | 81,600                                        | 0.20                | 3.0                                     | 32                                     | -                                  | 0.47           |
|            | Lower roadbed           | 1.5                              | 18.0                             | 51,000                                        | 0.30                | 10.0                                    | 30                                     | -                                  | 0.50           |
|            | Land fill               | 1.5                              | 17.0                             | 30,000                                        | 0.35                | 5.0                                     | 24                                     | 1.0×10 <sup>-3</sup>               | 0.59           |
|            | Silty clay              | 1.5                              | 17.0                             | 20,000                                        | 0.35                | 5.0                                     | 25                                     | 5.0×10 <sup>-4</sup>               | 0.58           |
|            | Weathered soil I        | 15.0                             | 19.0                             | 75,000                                        | 0.33                | 10.0                                    | 30                                     | 1.0×10 <sup>-4</sup>               | 0.50           |
|            | Weathered soil II       | 15.0                             | 19.0                             | 70,000                                        | 0.33                | 10.0                                    | 33                                     | 1.0×10 <sup>-4</sup>               | 0.46           |
|            | Weathered rock          | 7.0                              | 20.0                             | 110,000                                       | 0.31                | 60.0                                    | 42                                     | 1.0×10 <sup>-5</sup>               | 0.33           |
| KS60 rail  | Area (mm <sup>2</sup> ) | Unit weight (kN/m <sup>3</sup> ) |                                  | Elastic modulus (kPa)                         |                     | Moment of inertia(m <sup>4</sup> )      |                                        |                                    |                |
|            | 7,741                   | 77.5                             |                                  | 21,000×10 <sup>4</sup>                        |                     | I <sub>XX</sub> 30,820×10 <sup>-9</sup> | I <sub>YY</sub> 5,120×10 <sup>-9</sup> |                                    |                |
| PC sleeper | Length (m)              | Width (m)                        |                                  | Height (m)                                    |                     | Interval between sleepers (m)           |                                        |                                    |                |
|            | 2.45                    | 0.28                             |                                  | 0.20                                          |                     | 0.58                                    |                                        |                                    |                |
| Rail pad   | Thickness (mm)          | Unit weight (kN/m <sup>3</sup> ) |                                  | Vertical spring coefficient of rail pad (kPa) |                     |                                         |                                        |                                    |                |
|            | 5                       | 11.5                             |                                  | 15.3×10 <sup>7</sup>                          |                     |                                         |                                        |                                    |                |

243  
244  
245  
246

### 2.3 Allowable settlement of the roadbed

In general, an allowable settlement of 10 mm has been recommended in South Korea. The vibratory loading induces the gravel to be in a loose state, and frequent repairs of ballasts are required. Therefore, an allowable settlement of 2.5 mm is used to attain additional marginal safety considering the compressive displacement of both the rail pad and ballasts, settlement of rail, ride quality, and both water inflow and cracks in the pavement surface of roadbeds (Jeon, 2014).

252  
253  
254

## 3 Roadbed Settlement and Stability

255  
256

### 3.1 Roadbed settlement

The contours of ground settlement are presented for how the roadbed (Fig. 4) is influenced by a cavity adjacent to the urban railways. The contours of ground settlement are presented for cavities with diameters of 8 m and 10 m, respectively, at a distance of 20 m between the center of the roadbed and the center of the cavity. As shown in the figures, ground settlement increases as the diameter of the cavity increases. As a cavity is generated on the right side of the roadbed, the right end of the roadbed is significantly settled down.

262

(a)

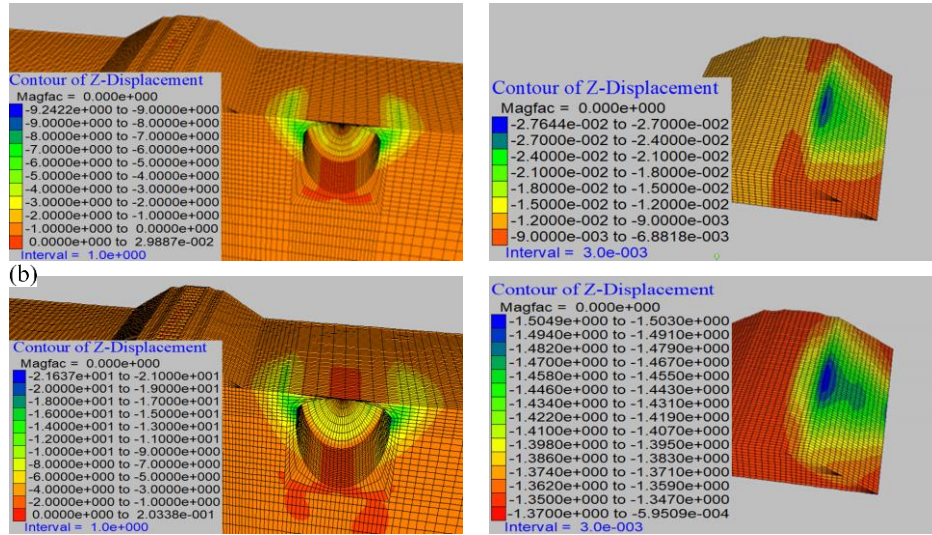

**Figure 4.** Vertical displacement contour of the roadbed at a distance of 20 m between the center of roadbed to the center of the cavity=20 m with respect to diameter of the cavity: **(a)** Diameter = 8 m and **(b)** Diameter = 10 m.

The analysis results (Fig. 5) are presented for cavities with diameters of 4-10 m. As the variation from 15 to 20 m in the distances between the center of the roadbed and the center of the cavity is applied to the 10 m cavity, roadbed settlements are calculated with respect to various diameters of the cavity. The cavity with a diameter of 10 m at a distance of 20 m has little influenced on the roadbed. However, as the diameter of the cavity at the same distance exceeds 10 m, the roadbed settlement exceeds the allowable value. As cavities with diameters of 8 and 6 m are generated, at distances less than 18 and 15 m, it exceeds the allowable settlement and may result in an accident.

The risk level has been estimated by the occurrence of roadbed settlements. Its risk level has been defined by the value of the roadbed settlements relative to the allowable settlement. The risk level is defined as safe (not problematic for both ride quality and track repair), caution (not problematic for track repair), warning (between caution and danger), and danger (highly probable traffic accident) as a settlement is equal to or less than 2.5 mm, greater than 2.5 mm and equal to or less than 4 mm, greater than 4 mm and equal to or less than 9mm, and greater than 9 mm, respectively.

Roadbed settlement increases as the diameter (D) of the cavity increases and the distance (d) between the roadbed and the cavity decreases. Therefore, in this study, the roadbed settlement is examined with respect to D normalized by d (Fig. 6). The regression analyses results show medium to high correlations of  $r^2=0.72$ . As D/d is greater than 0.2 and less than 0.3, the roadbed settlement is approximately 5 mm. It requires that a database of measurement sensors should be established for real-time monitoring of the roadbed, structures and groundwater to prevent disasters in advance. As D/d exceeds 0.35, the roadbed settlement substantially increases and is greater than 10 mm. Since it may result in highly probable traffic accident, train operation should be stopped and the roadbed should be reinforced or repaired.

### 3.2 Effects of groundwater level

In this study, the effects of groundwater level on the roadbed settlement are examined and it is lowered until the allowable settlement value of the roadbed is satisfied. The maximum distance between the roadbed and the cavity for the analysis is determined as the maximum value for the satisfied allowable settlement with no groundwater condition. A stability assessment of the roadbed has been carried out at the distance of 20 m for both 4 and 6 m diameter cavities and at 25 m for both the 8 and 10 m diameter cavities.

The contours of ground settlement (Fig. 7) are presented to examine the groundwater level (GWL) effects in the case of the 8 m diameter cavity located at a distance of 25 m from the roadbed to cavity. The contours of ground settlement are presented with GWL on the ground surface and 20 m below it, respectively (Figs. 7a and 7b). The settlement of the roadbed is highly subject to groundwater levels.

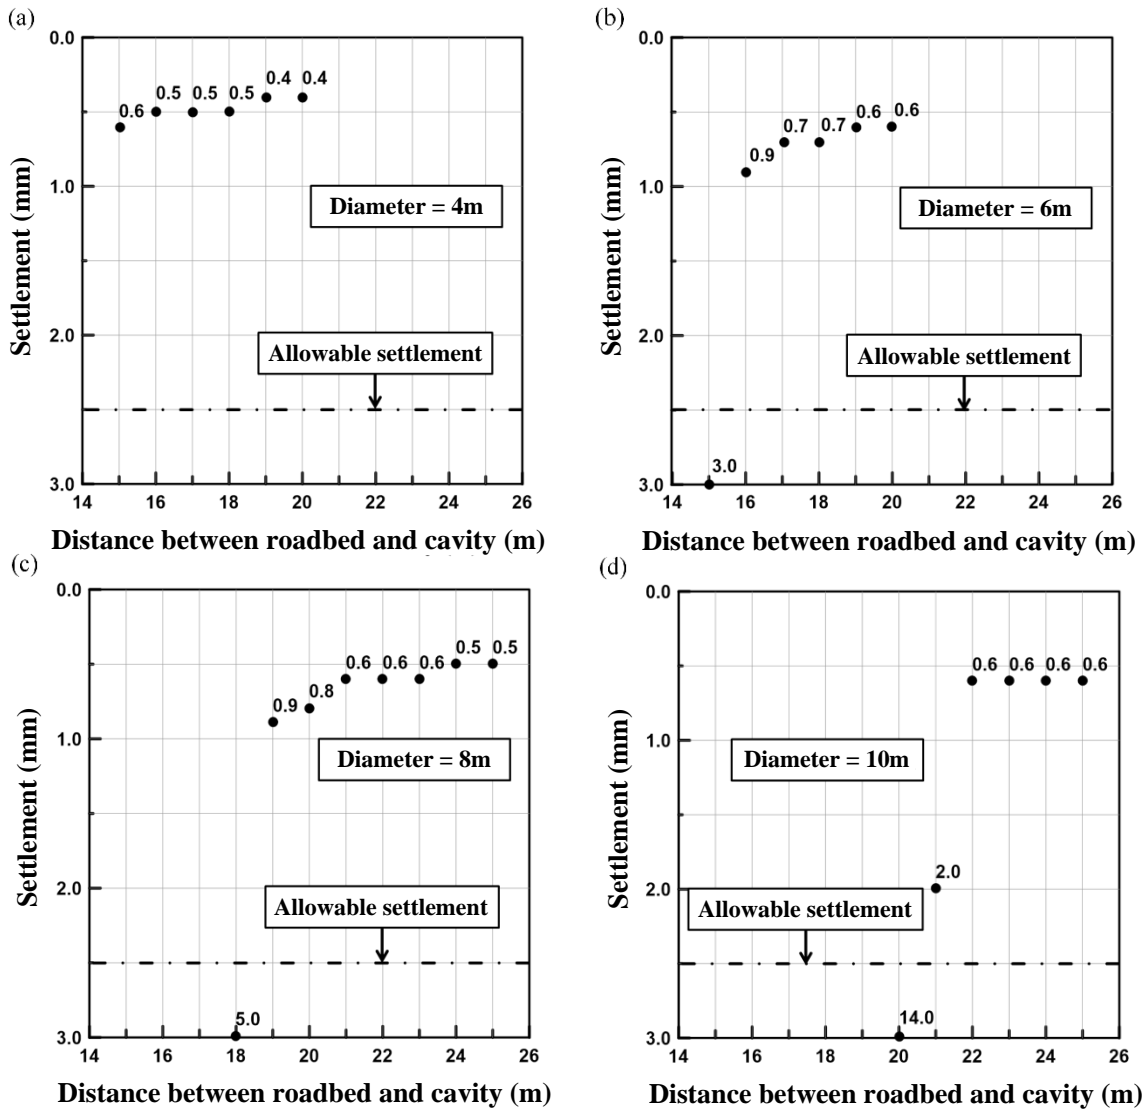

301 **Figure 5.** Roadbed settlement with respect to distance between roadbed and cavity: (a) Diameter = 4 m, (b) Diameter = 6 m,  
 302 (c) Diameter = 8 m, and (d) Diameter = 10 m.  
 303

304 The roadbed settlement (Fig. 8) is highly influenced by groundwater. Ground settlement for 4 and 6 m diameter  
 305 cavities located at a distance of 20 m from the roadbed (Figs. 8a and 8b) satisfies the allowable value for GWL = (-)  
 306 4 and (-) 12m, respectively. The ground settlement for 8 and 10 m diameter cavities located at a distance of 25 m  
 307 from the center of the roadbed (Figs. 8c and 8d) has substantially decreased as groundwater level is 8 and 15 m  
 308 below the ground surface, respectively, and satisfies the allowable value as its level is 18 and 22 m below the  
 309 ground surface, respectively. It indicates that a roadbed settlement is highly influenced by groundwater levels to an  
 310 extent greater than even the influence of the size of the cavity.  
 311



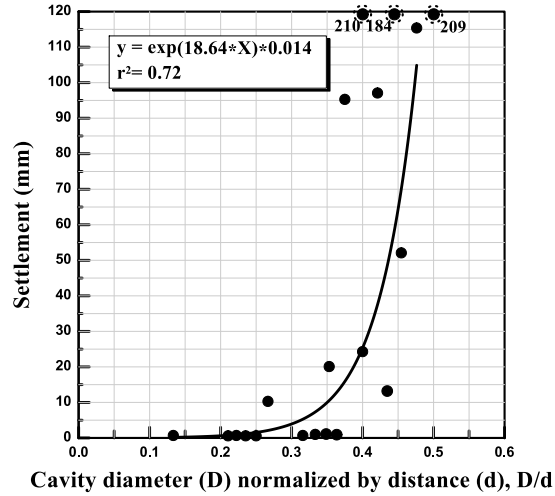

312  
313  
314  
315  
316  
317  
318  
319  
320

**Figure 6.** Regression analysis of roadbed settlements with respect to the diameter of the cavity and distance between roadbed and the cavity

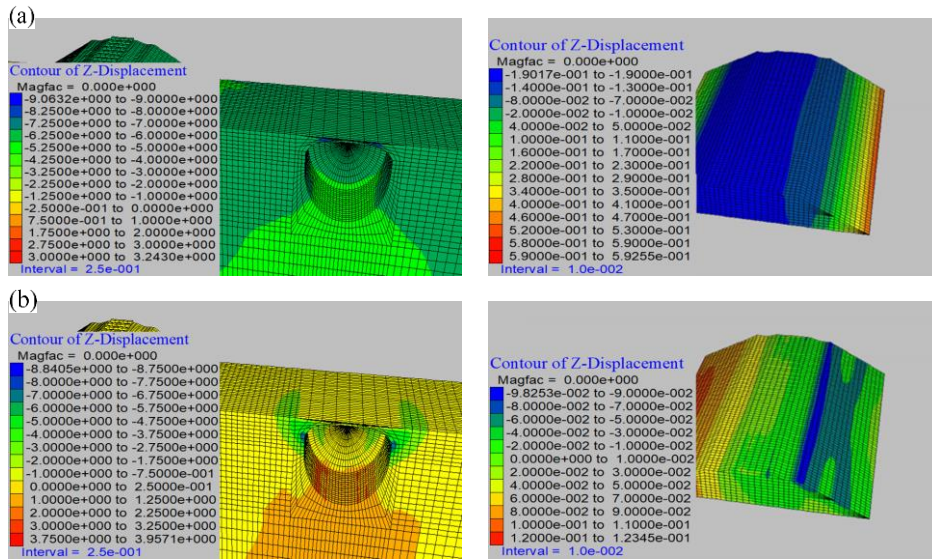

321  
322  
323  
324  
325  
326  
327  
328  
329  
330

**Figure 7.** Vertical displacement contours of the roadbed for a cavity diameter 8 m, at the roadbed-to-cavity distance of 25 m: (a) GWL = ground surface and (b) GWL = (-) 8 m.

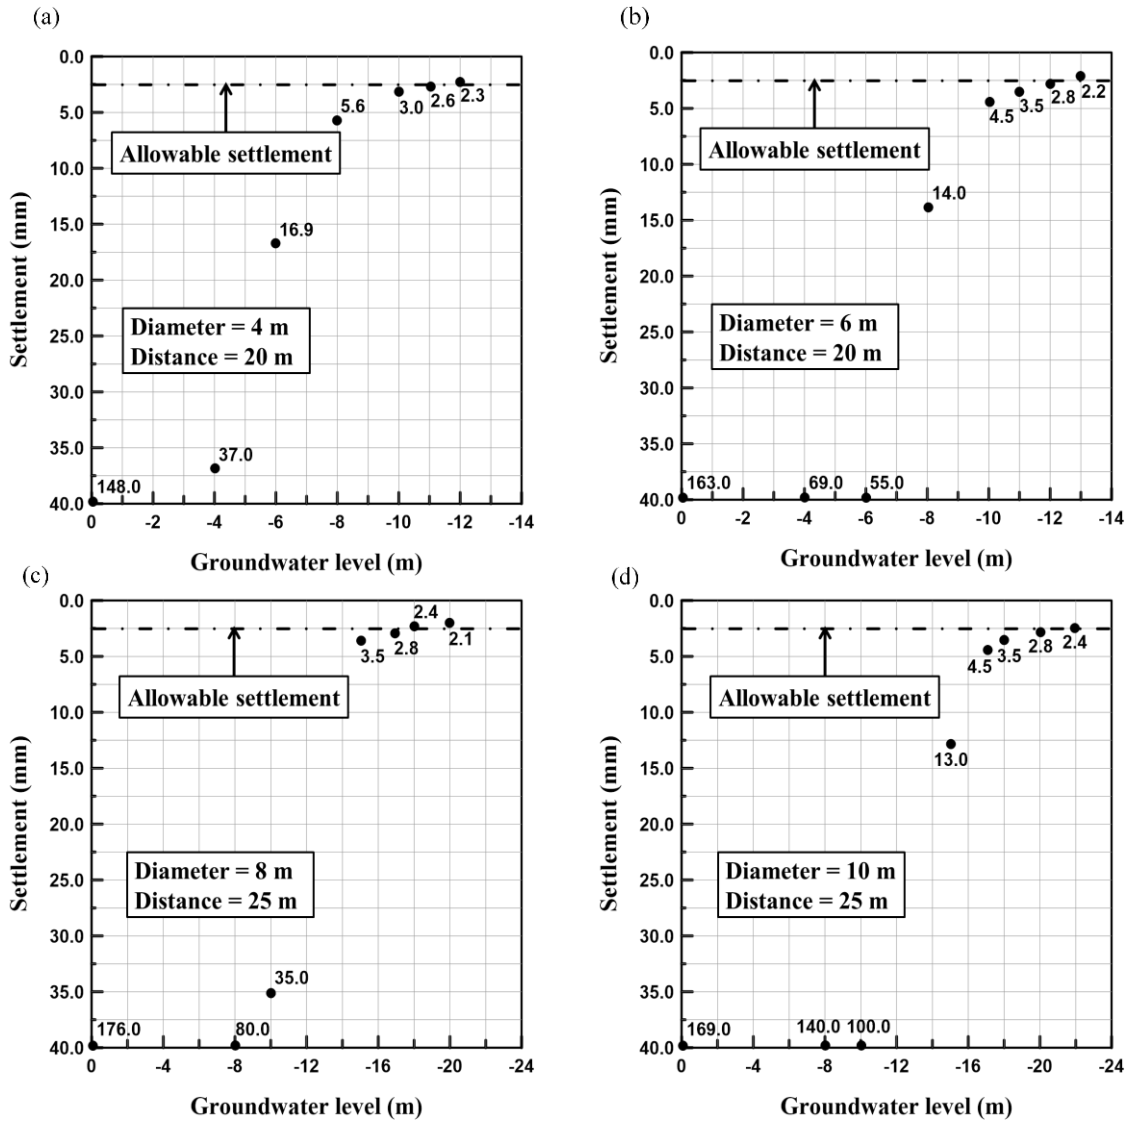

331 **Figure 8.** Roadbed settlement with respect to the groundwater level: (a) Diameter of the cavity = 4 m and distance of roadbed  
 332 from the center of the cavity = 20 m, (b) Diameter of the cavity = 6 m and distance of the roadbed from the center of cavity =20  
 333 m, (c) Diameter of the cavity = 8 m and distance of the roadbed from the center of cavity = 25 m, and (d) Diameter of the cavity  
 334 = 10 m and the distance of the roadbed from the center of the cavity = 25 m.

335  
 336  
 337  
 338  
 339  
 340  
 341  
 342  
 343  
 344  
 345  
 346  
 347  
 348  
 349

350  
351  
352

**Table 2.** Risk level of the roadbed with respect to the diameter of the cavity and the distance between the roadbed to the cavity for the groundwater condition

(Computation time: 3 weeks)

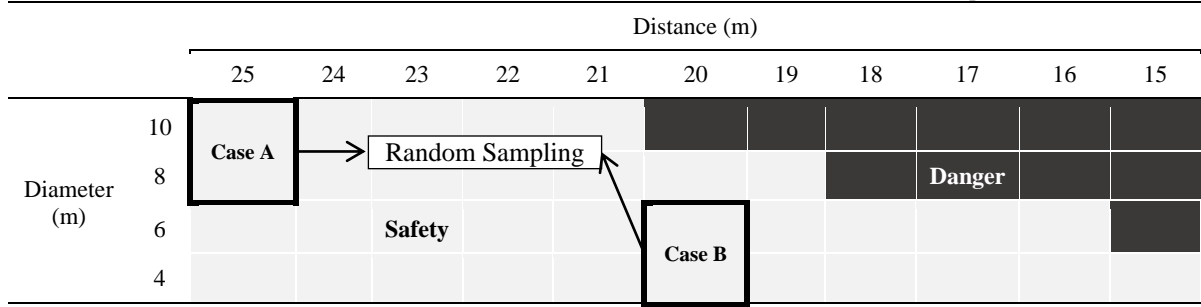

353

(Computation time: 4 days)

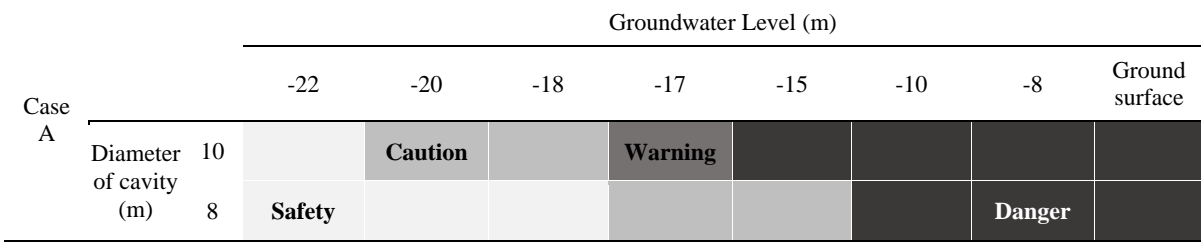

354

(Computation time: 3 days)

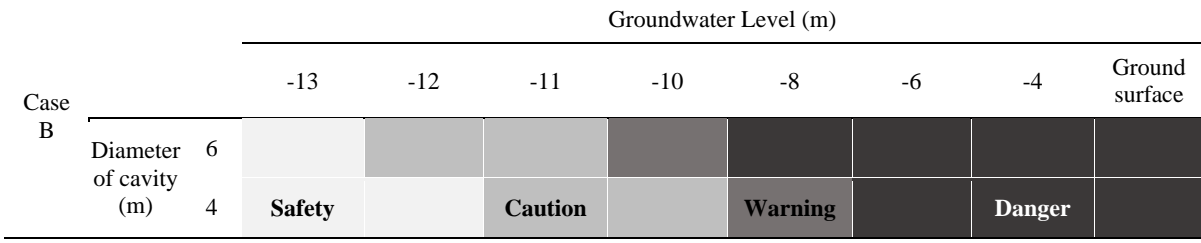

\* Safety(Settlement ≤ 2.5mm), Caution(2.5mm < Settlement ≤ 4.0mm), Warning(4.0mm < Settlement ≤ 9.0mm), Danger(9.0mm < Settlement)

355  
356  
357

**4 Conclusions**

The number of occurrences of ground subsidence induced by a leakage of aged pipelines for water and sewage in urban areas resulting in various sizes of cavity near the urban railway in Seoul City has been found to increase and it may cause the roadbed settlement to exceed the allowable value. A large-scale cavity is rarely found, but if it is close to the roadbed, the roadbed is highly influenced by the cavity and may cause train derailment.

In this study, numerical analyses are carried out to estimate roadbed stability and its risk level associated with various groundwater levels, sizes of cavities. The analyses results show that roadbed settlement increases as the diameter (D) of the cavity increases and the distance (d) between the roadbed and the cavity decreases. The regression analyses results show that, as D/d is greater than 0.2 and less than 0.3, a database of measurement sensors should be established for real-time monitoring of the roadbed, structures and groundwater to prevent disasters in advance. As D/d exceeds 0.35, the roadbed settlement, which substantially increases and is in the status of danger, may result in highly probable traffic accident. Therefore, train operation should be stopped and the roadbed should be reinforced or repaired. The effects of groundwater level on the roadbed settlement are examined at the distance of 20 m for both 4 and 6 m diameter cavities and at 25 m for both 8 and 10 m diameter cavities. Ground settlement for 4 and 6 m diameter cavities located at a distance of 20 m from the roadbed satisfies the allowable value for GWL = (-) 4 and (-) 12m, respectively. The ground settlement for 8 and 10 m diameter cavities located at a distance of 25 m from the center of the roadbed has substantially decreased as GWL is 8 and 15 m below the ground surface, respectively, and satisfies the allowable value as its level is 18 and 22 m below the ground surface, respectively. It indicates that a roadbed settlement is highly influenced by groundwater levels to an extent greater than even the influence of the size of the cavity.

376

377 *Acknowledgements.* This work was supported by the 2017 INJE University research grant.  
378

## 379 **References**

- 380  
381 Ashfaqe, K., Kladias, M., Sager, S., and Schlekot, T.: Numerical modeling to evaluate hydrological dynamics and risk  
382 assessment of bottom ash ponds at a former coal-fired electric power plant, World of coal ash conference, 1-13, 2017  
383 Berrado, A., El-Loursi, E., Cherkaoui, A., and Khaddour, M.: A Framework for Risk Management in Railway Sector:  
384 Application to Road-Rail Level Crossings. Open transportation Journal, Bentham Open, 19p., 2010.  
385 Braband, J.: Rapid Risk Assessment of Technical Systems in Railway Automation, Proc. Of the Australian System Safety  
386 Conference, 21 -26, 2011.  
387 Bozzano, F., Cipriani, I., Esposito, C., Martino, S., Mazzanti, P., Prestininzi, A., Rocca, A., and Mugnozza, G. S.: Landslide  
388 risk reduction by coupling monitoring and numerical modeling, International conference Vajont 1963-2013. Thoughts and  
389 analyses after 50 years since the catastrophic landslide, 315-322, 2013  
390 Cai, M., Kaiser, P. K., Morioka H., Minami, M., Maejima, T., Tasaka, Y., and Kurose, H.: FLAC/PFC coupled numerical  
391 simulation of AE in large-scale underground excavations, International Journal of Rock Mechanics & Mining Sciences, 44,  
392 550-564, 2007.  
393 Castellanza, R., Orlandi, G. M., Prisco, C. di, Frigerio, G., Flessati, L., Fernandez Merodo J. A., Agliardi, F., Grisi, S., and  
394 Crosta, G. B.: 3D numerical analyses for the quantitative risk assessment of subsidence and water flood due to the partial  
395 collapse of an abandoned gypsum mine. IOP Conf. Series: Earth and Environmental Science, 26, 1-7, 2015.  
396 Choi, C. Y., Kim, D. S., Lee, J. W., and Shin, M. H.: Development of Database System for Management of Roadbed Settlement  
397 in High Speed Railway, Proceedings of Korean Society for Railway Fall Conference, 496-500, 2007.  
398 Chosunilbo: Excavations for 15-m diameter large-scale sinkhole Fukuoka in Japan, [http://news.chosun.com/site/data/html](http://news.chosun.com/site/data/html_dir/2016/11/08/2016110801318.html)  
399 [dir/2016/11/08/2016110801318.html](http://news.chosun.com/site/data/html_dir/2016/11/08/2016110801318.html), last access: December 2016.  
400 Hakami, H: Rock Characterisation facility (RCF) shaft sinking – numerical computations using FLAC, International Journal of  
401 Rock Mechanics & Mining Sciences, 38, 59-65, 2001.  
402 Itasca Consulting Group, Inc: Outline of FLAC3D, <https://www.itascacg.com/software/flag3d#slideshow-6>, last access: June  
403 2017.  
404 Itasca Consulting Group, Inc: FLAC3D Manual-Theory and Background, Minnesota, USA, 2002.  
405 Jeon, S.-S.: Roadbed behavior subjected to tilting-train loading at rail joint and continuous welded rail, Journal of Central South  
406 University, 21, 2962-2969, 2014.  
407 Kyunghang times: Additional finings of ground subsidence in Seckchon subway in Seoul,  
408 [http://news.khan.co.kr/kh\\_news/khan\\_art\\_view.html?artid=201408211343301&code=940100](http://news.khan.co.kr/kh_news/khan_art_view.html?artid=201408211343301&code=940100), last access: December 2016.  
409 Kyunghang times: ‘6; sinkholes concurrence at the same time’ nearby Sanseongjungang of subway 9<sup>th</sup> line station,  
410 [http://sports.khan.co.kr/culture/sk\\_index.html?cat=view&art\\_id=201504031002483&sec\\_id=562901&pt=nv](http://sports.khan.co.kr/culture/sk_index.html?cat=view&art_id=201504031002483&sec_id=562901&pt=nv), last access:  
411 December 2016.  
412 Lee, H. J., Lee, Y. T., Choi, I. W., Lee, M. S., and Lee, T. G.: Investigation of Settlement of Concrete Track on High-Speed  
413 Railway Due to Groundwater Variation, Journal of the Korean Society for Railway, 20, 248-256, 2017.  
414 Lee, J. H., Lee, H. S., and Lee, I. H.: IoT-based Convergence Technology for Urban Underground Sinkhole Prediction, in: 2015  
415 Summer meeting of The institute of electronics and information engineering, The institute of electronics and information  
416 engineering, 1735-1737, 2015.  
417 Lee, K. Y. and Kang, S. J.: Causes and Countermeasures of Sinkhole Swallowed the City, Issue and Analysis, 156, 1-23, 2014.  
418 Lee, S. J., Lee, J. W., Jung, Y. N., and Cho, H. J.: Sensitivity Analysis of the Deformations caused by Cavity Generation in  
419 Subway Trackbed Foundation using the FEA, Proceedings of Korean Society for Railway Fall Conference, Yeosu, 1480-  
420 1485, 2015.  
421 Ministry of Land, Infrastructure and Transport, Seoul, Korea, available at: <http://www.molit.go.kr/portal.do>, last access: 15 June  
422 2015.  
423 Ministry of Land, Infrastructure and Transport.: Seoul, Korea, available at: <http://www.molit.go.kr/portal.do>, last access: 15  
424 May 2017.  
425 Newshankuk: Asphalt road in swallowed by sinkhole brief moment, [http://www.newshankuk.com/news/content.asp?fs=12&ss](http://www.newshankuk.com/news/content.asp?fs=12&ss=57&news_idx=201202201707081291)  
426 [=57&news\\_idx=201202201707081291](http://www.newshankuk.com/news/content.asp?fs=12&ss=57&news_idx=201202201707081291), last access: December 2016.  
427 Oh, D. W., Kong, S. M., Lee, D. Y., Yoo, Y. S., and Lee, Y. J.: Effects of Reinforced Pseudo-Plastic Backfill on the Behavior  
428 of Ground around Cavity Developed due to Sewer Leakage, Journal of the Korean Geoenvironmental Society, 16, 13-22,  
429 2015.  
430 Pisani, G., Castelli, M., and Scavia, C.: Hydrogeological model and hydraulic behavior of a large landslide in the Italian  
431 Western Alps. Nat. Hazards Earth Syst. Sci., 10, 2391-2406, 2010.  
432 Segye Ilbo: Half of sewage pipelines left for thirty years without maintenance leads to disaster of sinkhole,  
433 <http://www.segye.com/newsView/20150322002265>, last access: 3 December 2016.  
434 Shin, E. C. and Roh, J. M.: Estimation of RPS Method Using 3-Dimensional Numerical Analysis, Journal of the Korean Society

- 435 for Railway, 9, 174-179, 2006.
- 436 Sisa China: Three of buildings one subsidence at Guangzhou in China, [http://sscn.kr/news/view.html?section=1&](http://sscn.kr/news/view.html?section=1&category=5&no=3561)
- 437 [category=5&no=3561](http://sscn.kr/news/view.html?section=1&category=5&no=3561), last access: December 2016.
- 438 Wikitree: "Giant sinkhole" resulting in rushed car and depth of sheriff, [http://www.wikitree.co.kr/main/news\\_view.](http://www.wikitree.co.kr/main/news_view.php?id=284413)
- 439 [php?id=284413](http://www.wikitree.co.kr/main/news_view.php?id=284413), last access: December 2016.
- 440 Yonhap news: Large-scale at Ottawa in Canada sinkhole, [http://www.yonhapnews.co.kr/bulletin/2016/06/09/0200000000](http://www.yonhapnews.co.kr/bulletin/2016/06/09/0200000000AKR20160609069000009.HTML)
- 441 [AKR20160609069000009.HTML](http://www.yonhapnews.co.kr/bulletin/2016/06/09/0200000000AKR20160609069000009.HTML), last access: December 2016.
- 442 Zarembski, A. M. and Palese, J. W.: Managing Risk on the Railway Infrastructure, 7<sup>th</sup> World Congress on Railway Research, 1-
- 443 7, 2006
